# Supplementary material for: Resveratrol-induced mitochondrial synthesis and autophagy in oocytes derived from early antral follicles of aged cows
Source: PubMed Central journal article supplement — J Reprod Dev. 2015 Apr 12;61(4):251–9. doi: 10.1262/jrd.2015-001 (PMC4547982; doi:10.1262/jrd.2015-001), 2015-04-12

## Supplementary Figs. 1 and 2

Networks of genes having significantly different expression profiles in oocytes treated with resveratrol compared with untreated oocytes. The red-colored symbols represent genes that were upregulated in the resveratrol (+) group, and the green-colored symbols represent those that were downregulated. The numbers under each molecule indicate the *p* value, false discovery rate (q value), and the ratio of the expression level in the resveratrol (+) group to that in the control (-) group.

S-Fig 1

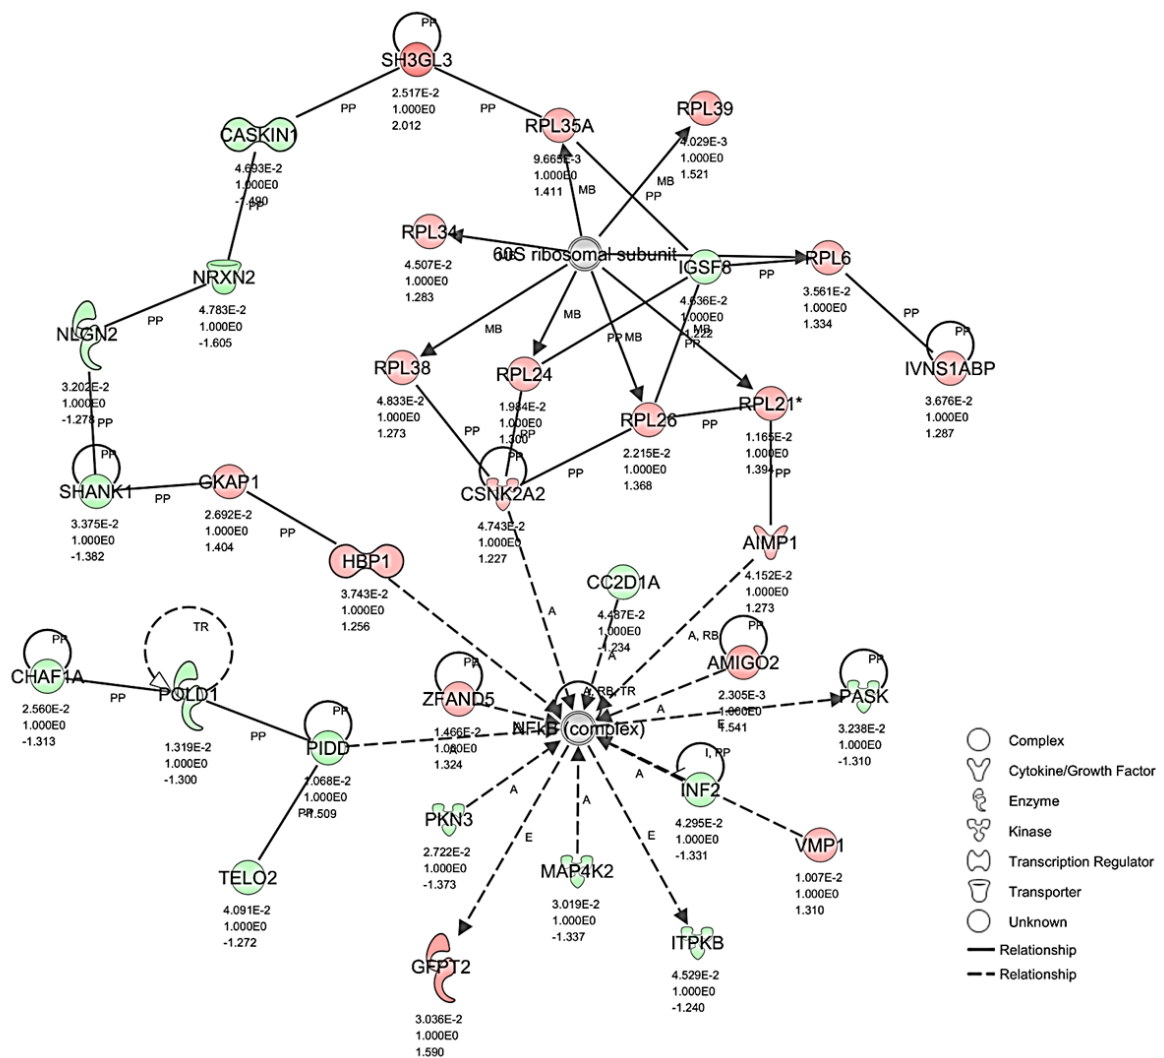

S-Fig2

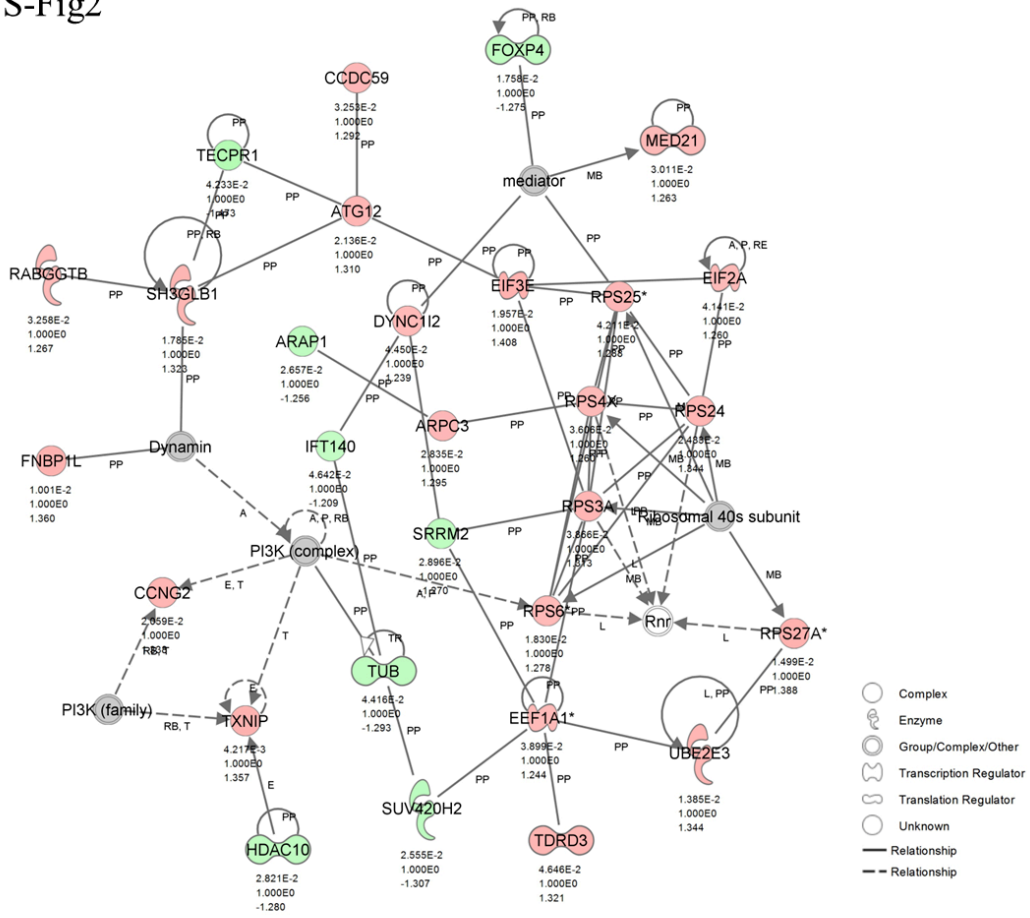

### Supplementary Fig. 3

Effects of donor age on the number of LC3 dots in oocytes observed by immunostaining. OGCs were collected from EAFs of young (8 cows, average  $\pm$  SEM,  $25.8 \pm 0.6$  in months of age) and aged (6 cows,  $167.0 \pm 9.1$  in month of age) cows. \* $P < 0.05$ .

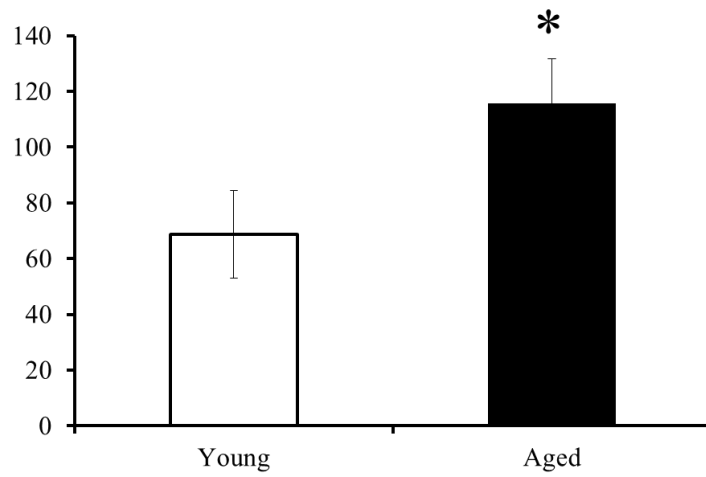

Supplement: jrd-61-251-s001.pdf [file jrd-61-251-s001.pdf]
